# Supplementary material for: Transcriptome profiling provides new insights into florets number difference of inflorescence in L.angustifolia
Source: Research Square preprint supplement (doi:10.21203/rs.3.rs-122486/v1), 2020-12-23
Supplement: Supplementary file 2 [file aad65f8992dc67f0ee65cdea.xlsx]

## Sheet: Sheet1
Table S1 Complete information for gene list in Figure 6a,b
	log2(FPKM)			annotation
GeneID	LF6	LF10	LF14	KO Name	KO Description	Http Link	Swissprot Evalue	Swissprot Description
Cluster-10130.50938	4.52419	3.8953	2.9241	PYL	abscisic acid receptor PYR/PYL family	http://www.genome.jp/dbget-bin/www_bget?ko:K14496	4.14793e-96	Abscisic acid receptor PYL8 OS=Arabidopsis thaliana GN=PYL8 PE=1 SV=1
Cluster-10130.36222	4.07039	6.66092	8.23209	PP2C	protein phosphatase 2C	http://www.genome.jp/dbget-bin/www_bget?ko:K14497	2.58664e-85	Protein phosphatase 2C 37 OS=Arabidopsis thaliana GN=PP2CA PE=1 SV=1
Cluster-10130.38198	4.16027	5.80787	7.07948	PP2C	protein phosphatase 2C	http://www.genome.jp/dbget-bin/www_bget?ko:K14497	1.28729e-76	Probable protein phosphatase 2C 51 OS=Oryza sativa subsp. japonica GN=Os05g0572700 PE=2 SV=1
Cluster-10130.31947	2.31615	6.17013	7.4065	PP2C	protein phosphatase 2C	http://www.genome.jp/dbget-bin/www_bget?ko:K14497	4.58512e-126	Probable protein phosphatase 2C 6 OS=Oryza sativa subsp. japonica GN=Os01g0583100 PE=1 SV=1
Cluster-10130.31950	2.41414	4.57773	6.58661	PP2C	protein phosphatase 2C	http://www.genome.jp/dbget-bin/www_bget?ko:K14497	5.25464e-102	Probable protein phosphatase 2C 6 OS=Oryza sativa subsp. japonica GN=Os01g0583100 PE=1 SV=1
Cluster-10130.36213	4.97636	6.35226	6.71136	PP2C	protein phosphatase 2C	http://www.genome.jp/dbget-bin/www_bget?ko:K14497	5.69923e-102	Protein phosphatase 2C 37 OS=Arabidopsis thaliana GN=PP2CA PE=1 SV=1
Cluster-10130.38877	4.07125	5.87725	6.5008	PP2C	protein phosphatase 2C	http://www.genome.jp/dbget-bin/www_bget?ko:K14497	1.40506e-128	Protein phosphatase 2C 37 OS=Arabidopsis thaliana GN=PP2CA PE=1 SV=1
Cluster-10130.39709	4.48736	5.27724	6.04177	PP2C	protein phosphatase 2C	http://www.genome.jp/dbget-bin/www_bget?ko:K14497	6.69314e-168	Protein phosphatase 2C 7 OS=Arabidopsis thaliana GN=HAB2 PE=1 SV=2
Cluster-10130.36254	3.69599	4.54226	5.14282	PP2C	protein phosphatase 2C	http://www.genome.jp/dbget-bin/www_bget?ko:K14497	6.69586e-170	Protein phosphatase 2C 16 OS=Arabidopsis thaliana GN=HAB1 PE=1 SV=1
Cluster-10130.35380	-0.168123	4.02768	4.67299	PP2C	protein phosphatase 2C	http://www.genome.jp/dbget-bin/www_bget?ko:K14497	1.43511e-131	Protein phosphatase 2C 3 OS=Arabidopsis thaliana GN=AIP1 PE=1 SV=1
Cluster-10130.32488	2.66903	4.95327	5.12928	SNRK2	serine/threonine-protein kinase SRK2	http://www.genome.jp/dbget-bin/www_bget?ko:K14498	0	Serine/threonine-protein kinase SRK2I OS=Arabidopsis thaliana GN=SRK2I PE=1 SV=1
Cluster-10130.33471	4.59216	5.34199	3.25701	SNRK2	serine/threonine-protein kinase SRK2	http://www.genome.jp/dbget-bin/www_bget?ko:K14498	0	Serine/threonine-protein kinase SAPK2 OS=Oryza sativa subsp. indica GN=SAPK2 PE=2 SV=2
Cluster-10130.28071	5.59455	3.2555	5.39609	SNRK2	serine/threonine-protein kinase SRK2	http://www.genome.jp/dbget-bin/www_bget?ko:K14498	0	Serine/threonine-protein kinase SAPK2 OS=Oryza sativa subsp. indica GN=SAPK2 PE=2 SV=2
Cluster-10130.33431	3.98823	6.52591	6.20144	ABF	ABA responsive element binding factor	http://www.genome.jp/dbget-bin/www_bget?ko:K14432	1.38924e-35	ABSCISIC ACID-INSENSITIVE 5-like protein 5 OS=Arabidopsis thaliana GN=ABF2 PE=1 SV=1
Cluster-10130.28422	3.80839	3.46858	3.31759	ABF	ABA responsive element binding factor	http://www.genome.jp/dbget-bin/www_bget?ko:K14432	2.83525e-41	ABSCISIC ACID-INSENSITIVE 5-like protein 7 OS=Arabidopsis thaliana GN=ABF4 PE=1 SV=1
Cluster-10130.40990	6.02702	5.91934	5.02414	NCED	9-cis-epoxycarotenoid dioxygenase	http://www.genome.jp/dbget-bin/www_bget?ko:K09840	0	Probable carotenoid cleavage dioxygenase 4, chloroplastic OS=Arabidopsis thaliana GN=CCD4 PE=1 SV=1
Cluster-10130.34829	4.76871	7.09191	7.52089	NCED	9-cis-epoxycarotenoid dioxygenase	http://www.genome.jp/dbget-bin/www_bget?ko:K09840	0	9-cis-epoxycarotenoid dioxygenase NCED1, chloroplastic OS=Phaseolus vulgaris GN=NCED1 PE=2 SV=1
Cluster-10130.42768	3.62293	5.25776	6.75529	NCED	9-cis-epoxycarotenoid dioxygenase	http://www.genome.jp/dbget-bin/www_bget?ko:K09840	9.66055e-71	9-cis-epoxycarotenoid dioxygenase NCED1, chloroplastic OS=Phaseolus vulgaris GN=NCED1 PE=2 SV=1
Cluster-10130.29693	3.60881	5.2521	6.07617	NCED	9-cis-epoxycarotenoid dioxygenase	http://www.genome.jp/dbget-bin/www_bget?ko:K09840	0	9-cis-epoxycarotenoid dioxygenase NCED3, chloroplastic OS=Arabidopsis thaliana GN=NCED3 PE=2 SV=1
Cluster-10130.19560	2.90304	5.2604	5.9991	BCH	beta-carotene 3-hydroxylase	http://www.genome.jp/dbget-bin/www_bget?ko:K15746	1.28763e-108	Beta-carotene 3-hydroxylase, chloroplastic OS=Gentiana lutea GN=BHY PE=2 SV=1
