# Supplementary figures and images for: Transcriptome profiling provides new insights into florets number difference of inflorescence in L.angustifolia
Source: Research Square preprint supplement (doi:10.21203/rs.3.rs-122486/v1), 2020-12-23

**Fig.S1**

**
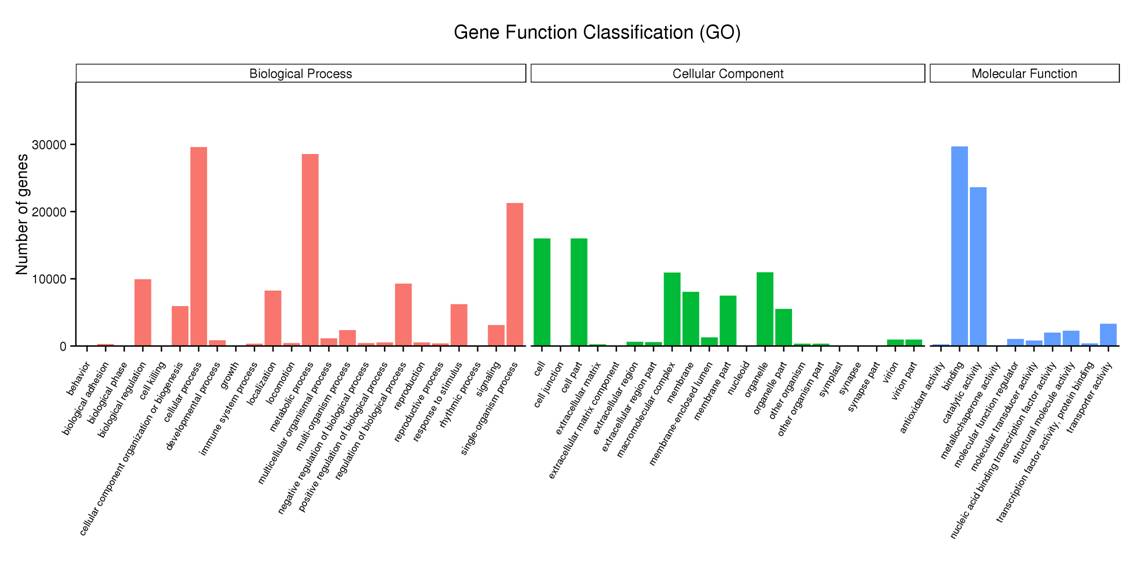
**

Supplement: Supplementary file 1 [file 92d701f2c854fd347795b3c4.doc]

**Fig.S2**

**
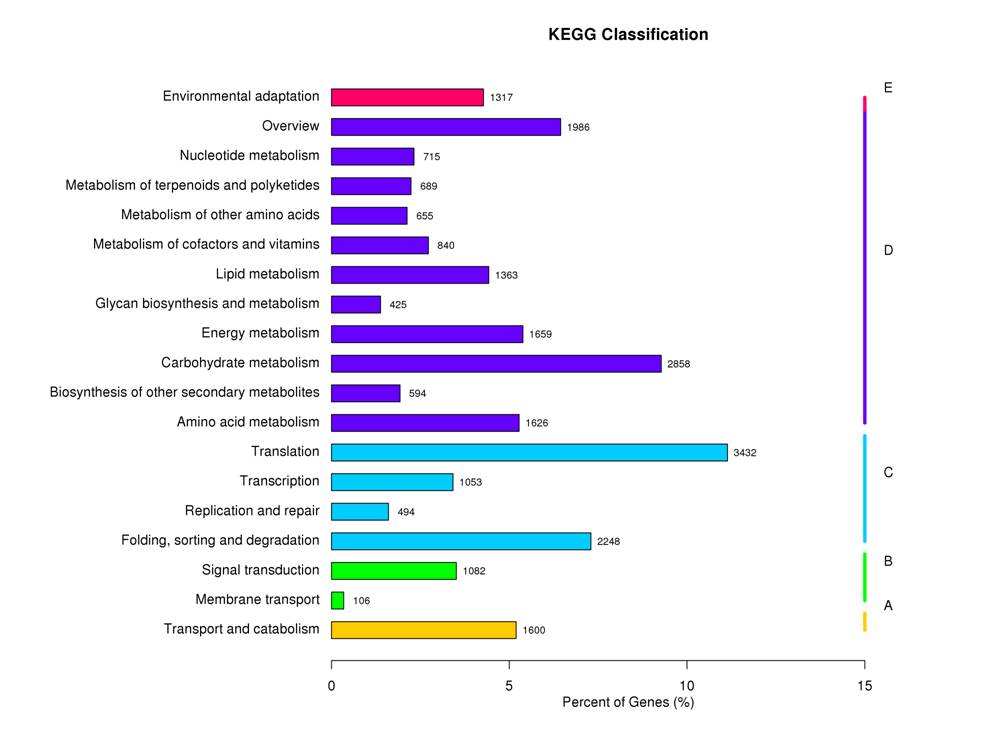
**

Supplement: Supplementary file 1 [file b7719f950707e2f6571c1cb4.doc]
